# Supplementary material for: Epidemiology of Arterial Hypertension in Kazakhstan: Data from Unified Nationwide Electronic Healthcare System 2014–2019
Source: MDPI journal article supplement (doi:10.3390/jcdd9020052), 2022-02-05
Supplement: s1 [file s1]

**Figure S1.** Absolute numbers of new case, prevalent cases and deaths of hypertension in Kazakhstan for 2014 – 2019 years.

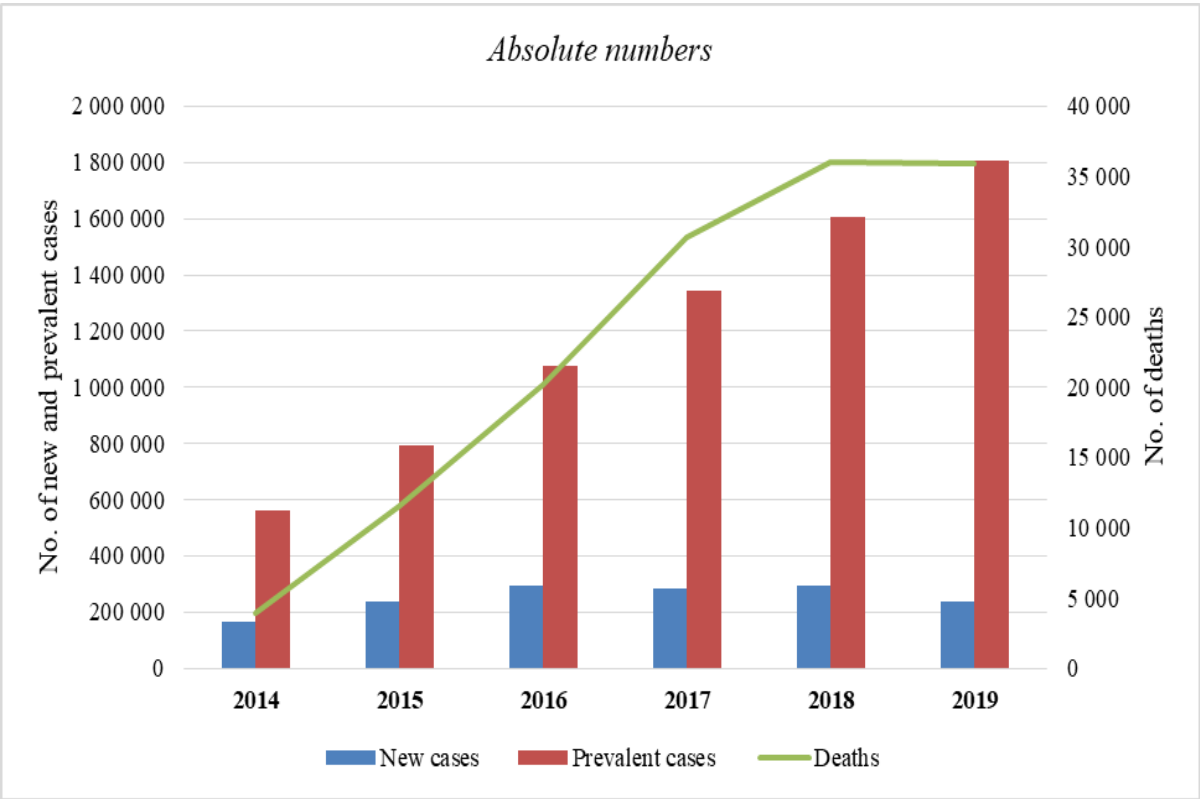

**Figure S2.** Crude (A) and age standardized incidence (B) rates of hypertension for men and women.

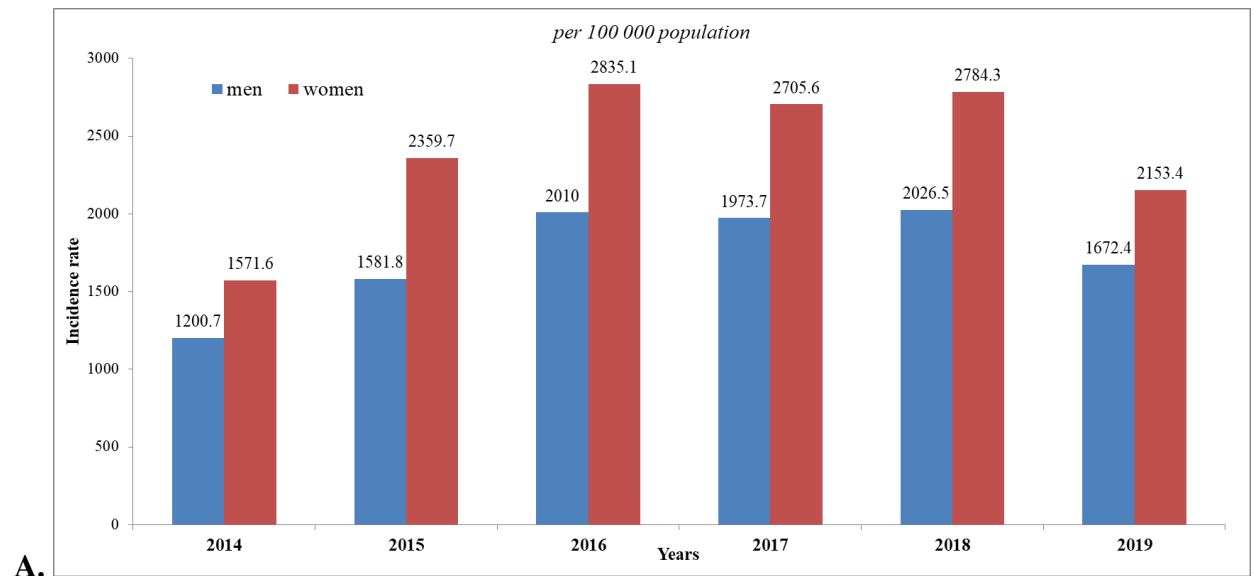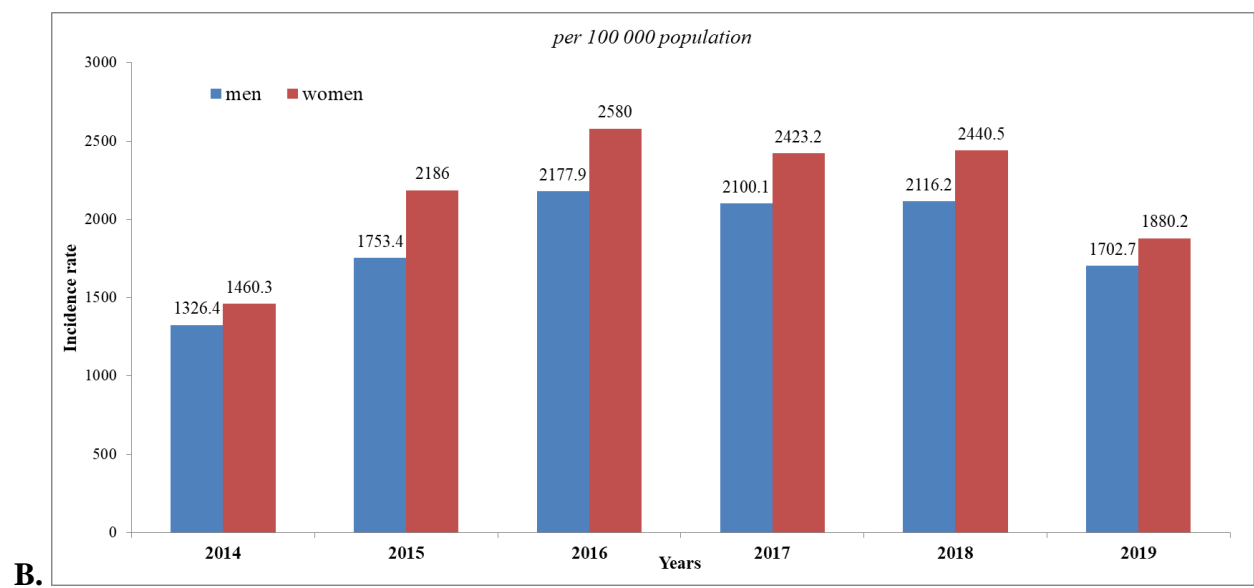

**Figure S3.** Crude incidence rate of hypertension for urban and rural population.

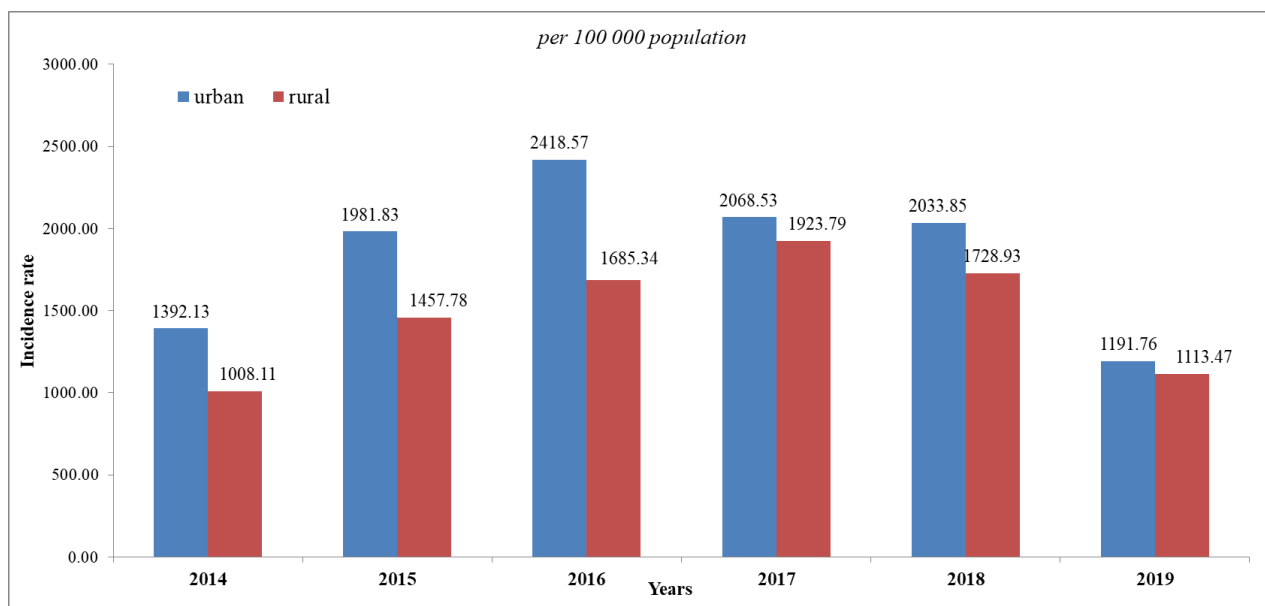

**Figure S4.** Crude (A) and age & sex standardized (B) all-cause mortality rates of hypertension patients in Kazakhstan.

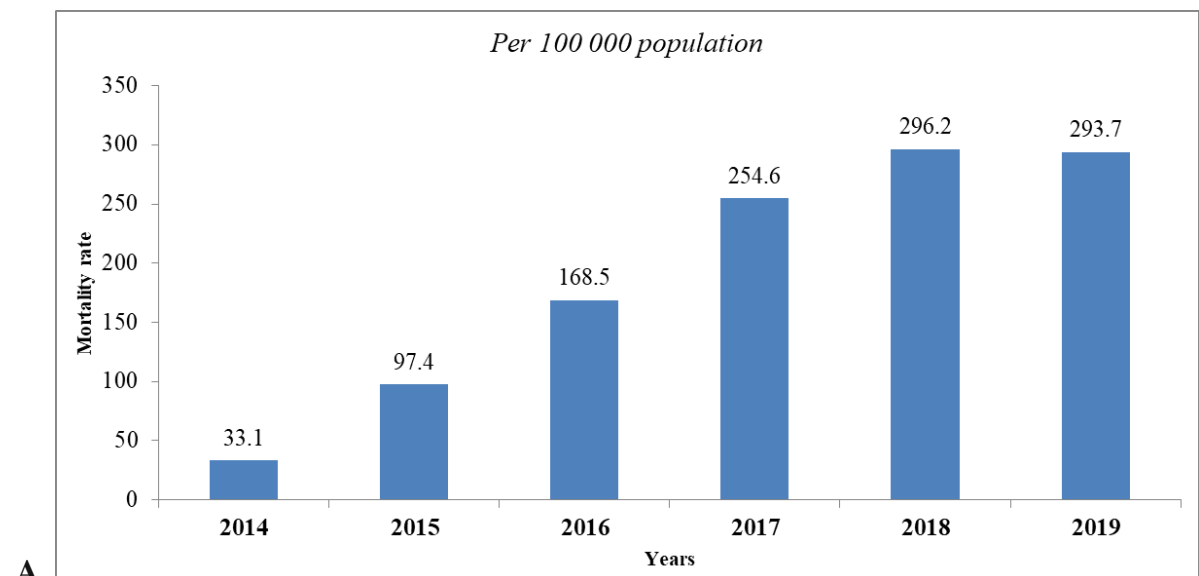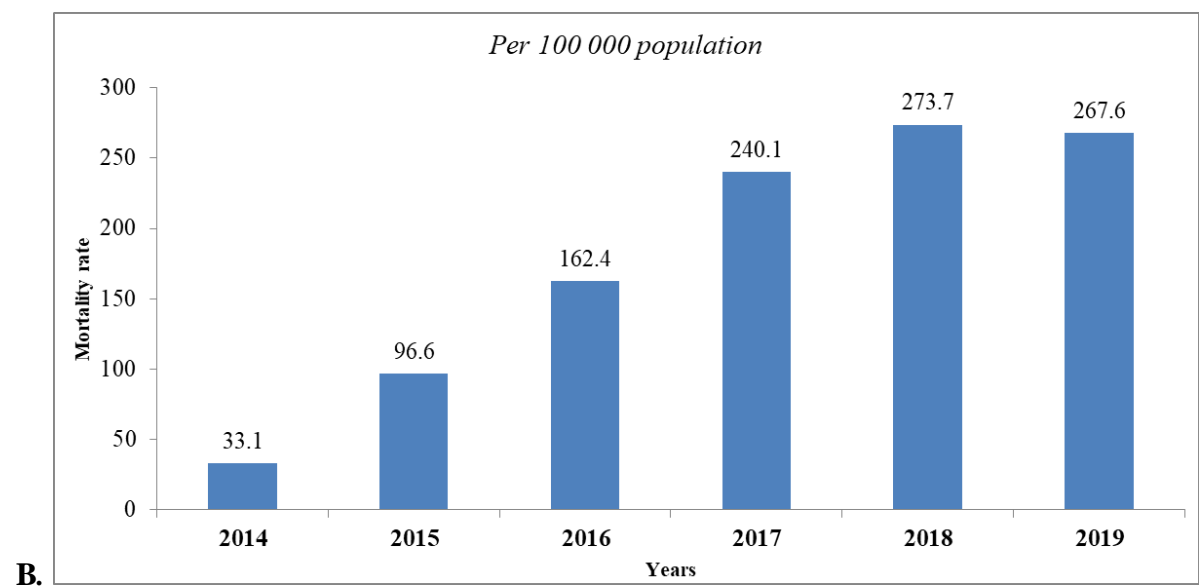

**Table S1.** Multivariable Cox proportional hazards regression analysis with unadjusted and adjusted values for 2014 – 2019 years.

| Variables              | Unadjusted (95% CI)   | p-value         | Model 1* (95% CI)     | p-value         | Model 2** (95% CI)    | p-value         |
|------------------------|-----------------------|-----------------|-----------------------|-----------------|-----------------------|-----------------|
| Gender                 |                       |                 |                       |                 |                       |                 |
| Women                  | Ref.                  |                 | Ref.                  |                 | Ref.                  |                 |
| Men                    | 1.71 [1.69 - 1.72]    | <i>p</i> <0.001 | 1.98 [1.96 - 2.00]    | <i>p</i> <0.001 | 1.93 [1.91 - 1.95]    | <i>p</i> <0.001 |
| Age groups             |                       |                 |                       |                 |                       |                 |
| 18-24                  | Ref.                  |                 | Ref.                  |                 |                       |                 |
| 25-34                  | 1.41 [1.09 - 1.81]    |                 | 1.59 [1.23 - 2.05]    |                 | 1.49 [1.15 - 1.94]    |                 |
| 35-44                  | 1.95 [1.54 - 2.49]    |                 | 2.29 [1.81 - 2.92]    |                 | 2.19 [1.72 - 2.81]    |                 |
| 45-54                  | 3.13 [2.46 - 3.97]    | <i>p</i> <0.001 | 3.73 [2.94 - 4.73]    | <i>p</i> <0.001 | 3.52 [2.75 - 4.49]    | <i>p</i> <0.001 |
| 55-64                  | 6.34 [4.99 - 8.04]    |                 | 7.59 [5.98 - 9.64]    |                 | 6.97 [5.46 - 8.89]    |                 |
| 65-74                  | 13.38 [10.54 - 16.98] |                 | 16.52 [13.01 - 20.97] |                 | 14.86 [11.64 - 18.97] |                 |
| 75<                    | 35.68 [28.11 - 45.31] |                 | 45.66 [35.97 - 57.97] |                 | 40.44 [31.68 - 51.62] |                 |
| Ethnicity              |                       |                 |                       |                 |                       |                 |
| Kazakh                 | Ref.                  |                 | Ref.                  |                 |                       |                 |
| Russian                | 1.56 [1.54 - 1.58]    | <i>p</i> <0.001 | 1.18 [1.17 - 1.19]    | <i>p</i> <0.001 | 1.21 [1.19 - 1.22]    | <i>p</i> <0.001 |
| Other                  | 1.43 [ 1.41 - 1.45]   |                 | 1.15 [1.13 - 1.17]    |                 | 1.15 [1.14 - 1.17]    |                 |
| Place of residence     |                       |                 |                       |                 |                       |                 |
| Urban                  | Ref.                  |                 | Ref.                  |                 |                       |                 |
| Rural                  | 0.88 [0.88 - 0.89]    | <i>p</i> <0.001 | 1.06 [1.05 - 1.07]    | <i>p</i> <0.001 | 1.14 [1.13 - 1.15]    | <i>p</i> <0.001 |
| Comorbidities          |                       |                 |                       |                 |                       |                 |
| Diabetes               | 1.32 [1.30 - 1.34]    |                 | 1.35 [1.33 - 1.36]    |                 | 1.27 [1.25 - 1.29]    |                 |
| Stroke                 | 3.31 [3.26 - 3.36]    | <i>p</i> <0.001 | 2.69 [2.65 - 2.73]    | <i>p</i> <0.001 | 2.62 [2.58 - 2.66]    | <i>p</i> <0.001 |
| Chronic Kidney Disease | 3.49 [3.35 - 3.65]    |                 | 4.54 [4.35 - 4.74]    |                 | 4.18 [3.99 - 4.36]    |                 |

\*Model 1: adjusted for sex and age.

\*\*Model 2: adjusted for Model1+ethnicity, residence and comorbidities.
